# Supplementary material for: Kinetic study on the grain growth of PuO2 nanocrystals
Source: Royal Society of Chemistry journal article supplement (doi:10.1039/c8ra10430a), 2019-01-01
Supplement: c8ra10430a1.pdf [file c8ra10430a1.pdf]

## Kinetic study on the grain growth of PuO<sub>2</sub> nanocrystals

Daniel Bouëxière,<sup>a</sup> Karin Popa<sup>a</sup>, Olaf Walter,<sup>a,\*</sup> Marco Cologna<sup>a</sup>

European Commission, DG Joint Research Centre, JRC-Karlsruhe, P.O. Box 2340, 76125 Karlsruhe,  
Germany

| Supplementary Information                                                                                                 | page |
|---------------------------------------------------------------------------------------------------------------------------|------|
| Figure S1: Rietveld analyses of PuO <sub>2</sub> nano particles                                                           | 2    |
| Figure S2: Rietveld analyses of PuO <sub>2</sub> nano particles on Pt HT sample holder                                    | 3    |
| Figure S3: Powder XRD analyses of PuO <sub>2</sub> nano particles on Pt HT sample holder<br>at the end of the measurement | 4    |
| Figure S4: Crystallite growth fitted to the growth model of Eq. 2, exponent n in<br>the range n = 2 to 4.                 | 4    |
| Figure S5: Crystallite size as a function of time at different isothermal temperatures.                                   | 5    |

## Supporting information

Figure S1) Rietveld analyses of  $\text{PuO}_2$  nano particles (HighScore plus [1])

Profile plot: red: measured diffractogram, blue: calculated profile, green: background, Number of variables: 10, Number of constraints: 3, Zero shift/  $^\circ 2\theta$ : 0, Specimen displacement/ mm : 0, Profile function: Pseudo Voigt, R (expected)/ %: 1.86, R (profile)/ %: 3.00, R (weighted profile)/ %: 3.81. Cell symmetry and parameter: cubic, Fm-3m (no. 225),  $a = 5.4042(2) \text{ \AA}$ .

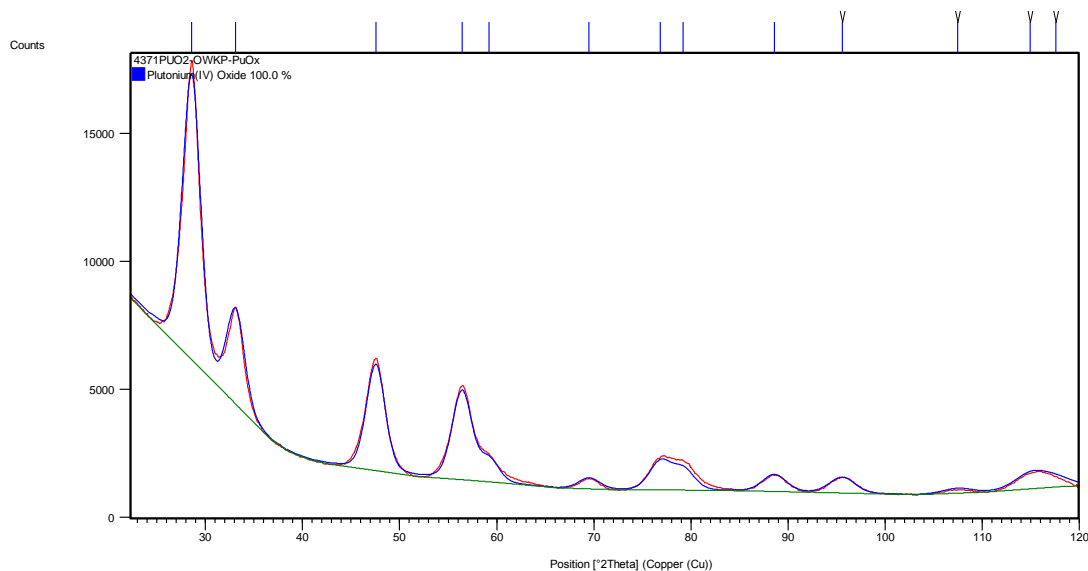

Difference plot (identical x-axis, y-axis scale multiplied by 250, peak position in blue on top):

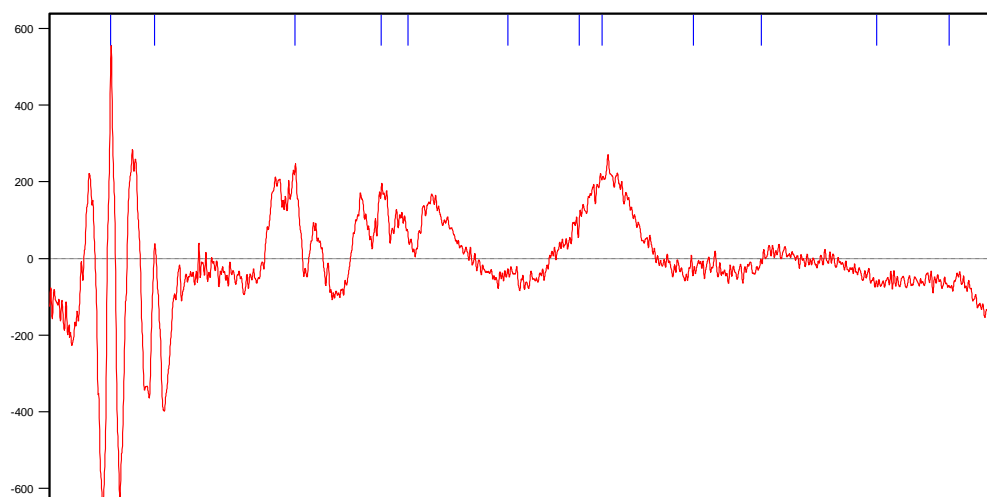

## Supporting information

Figure S2) Rietveld analyses of PuO<sub>2</sub> nano particles on Pt HT sample holder

Profile plot: red: measured diffractogram, blue: calculated profile, green: background, Number of variables: 23, Number of constraints: 2, Zero shift/ °2Theta: 0, Specimen displacement/ mm : 0, Profile function: Pseudo Voigt, R (expected)/ %: 8.97, R (profile)/ %: 6.43, R (weighted profile)/ %: 8.64. Cell symmetry and parameter: cubic, Fm-3m (no. 225), a= 3.92898(3) for Pt and a = 5.4116(7) Å for PuO<sub>2</sub>.

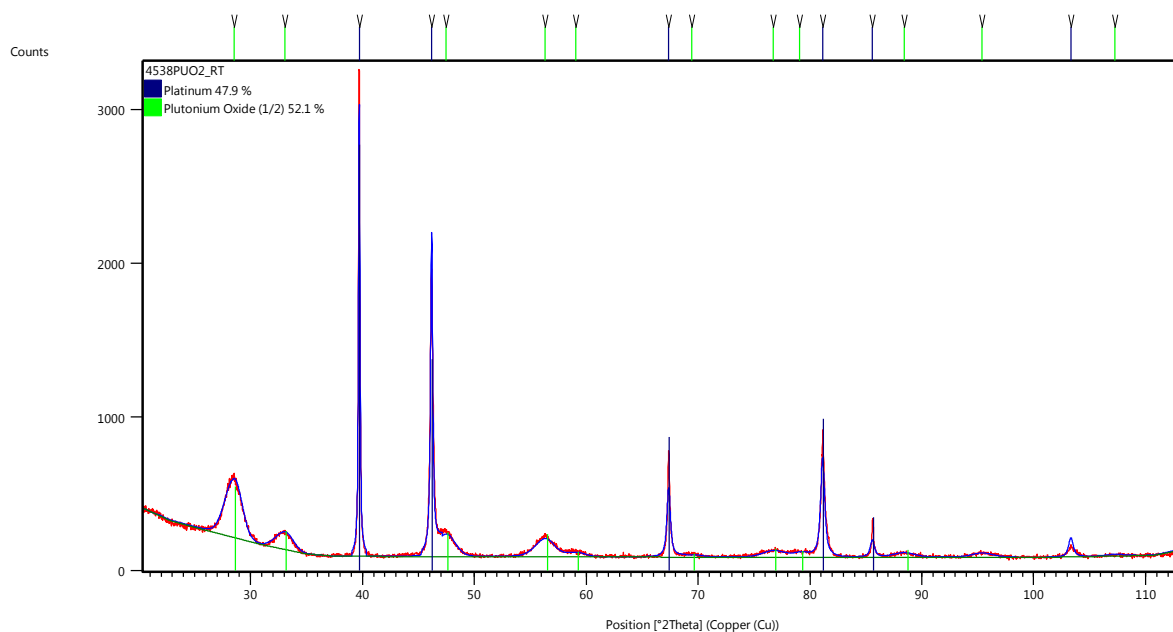

Difference plot (identical x-axis, y-axis scale multiplied by 10, peak position in blue (Pt) and green (PuO<sub>2</sub>) on top):

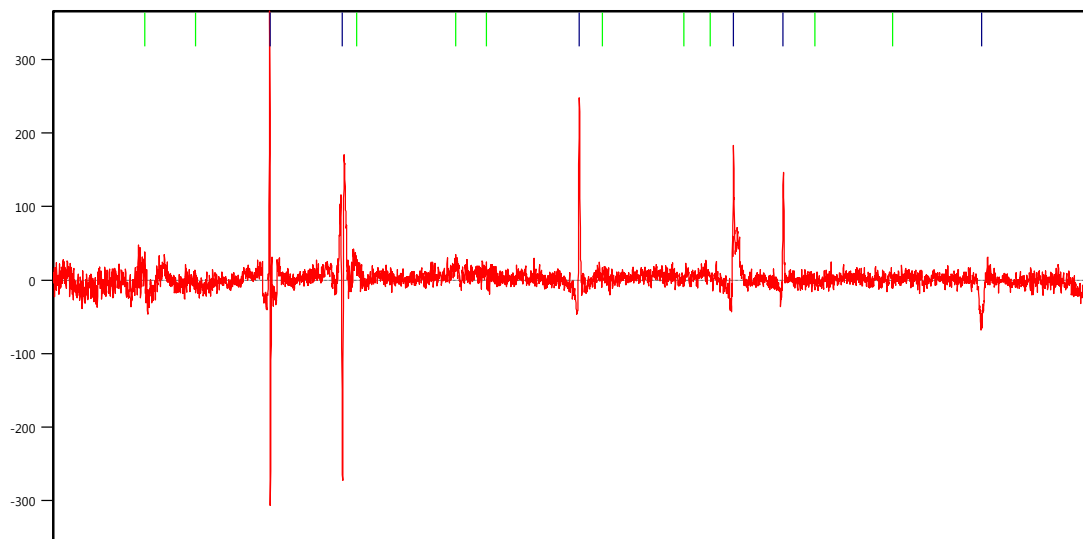

Figure S3) diffractogram of  $\text{PuO}_2$  nano particles on Pt HT sample holder at the end of the series of the measurements

Profile plot: red: measured diffractogram, blue: calculated profile, green: background. Presentation only for comparison with Figure S2.

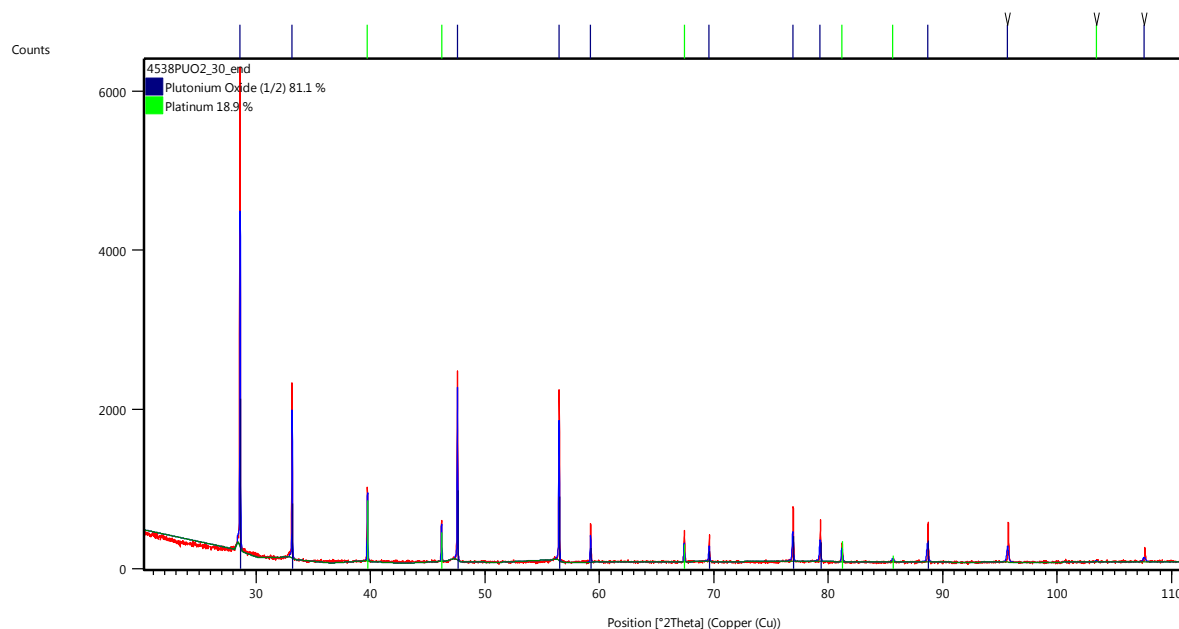

Figure S4: Crystallite growth fitted to the growth model of Eq. 2, exponent  $n$  in the range  $n = 2$  to 4. The slope of the linear regression gives the grain growth constant  $k$ , reported in **Table 2**.

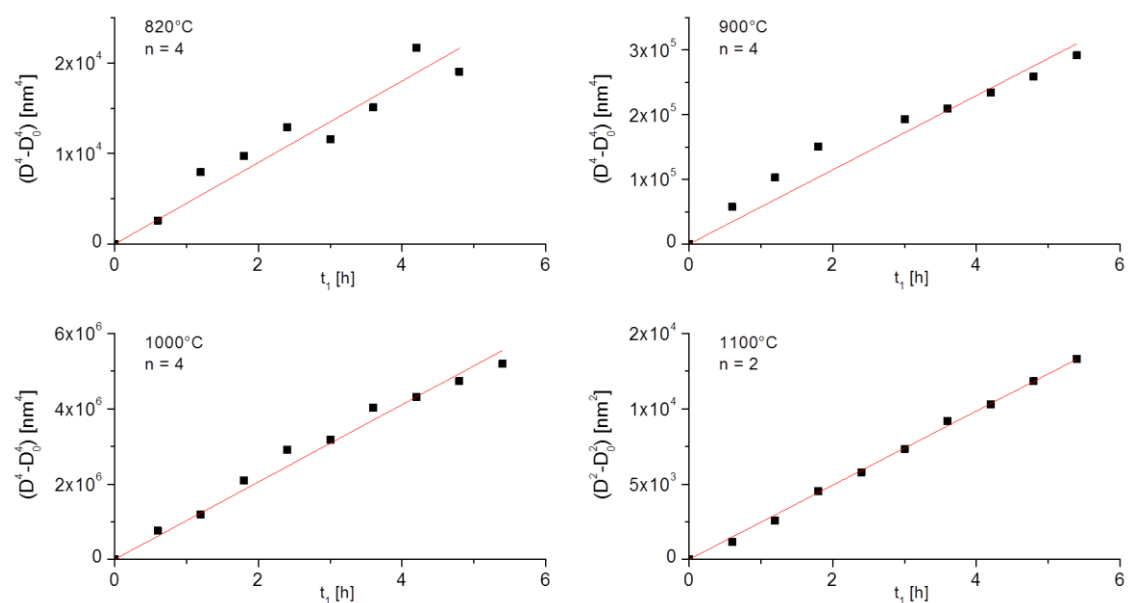

Figure S5: Crystallite size as a function of time at different isothermal temperatures.

The slope of the linear regression gives the grain growth constant  $k$ , reported in **Table 2**.

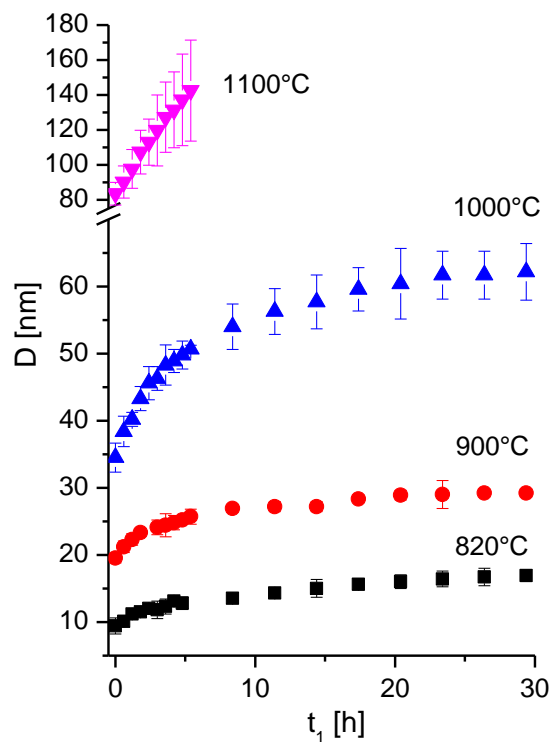

## Literature

[1] The HighScore suite, T. Degen, M. Sadki, E. Bron, U. König, G. Nénert; Powder Diffraction / Volume 29 / Supplement S2 / December 2014, pp S13-S18.
